# Supplementary material for: Total synthesis of high loading capacity PEG-based supports: evaluation and improvement of the process by use of ultrafiltration and PEG as a solvent
Source: Royal Society of Chemistry journal article supplement (doi:10.1039/c3gc37097f), 2013-01-01

**Total synthesis of high loading capacity PEG-based supports. Evaluation and improvement of the process by use of ultrafiltration and PEG as solvent.**

Raphaël Turgis,<sup>a</sup> Isabelle Billault,<sup>a</sup> Samir Acherar,<sup>a</sup> Jacques Augé,<sup>\*b</sup> Marie-Christine Scherrmann<sup>\*a</sup>

<sup>a</sup> Université Paris Sud, ICMO, UMR CNRS 8182, Bâtiment 410, 91405 Orsay, France; E-mail: marie-christine.scherrmann@u-psud.fr

<sup>b</sup> Université de Cergy-Pontoise, SOSCO, 5 mail Gay-Lussac, Neuville sur Oise, 95031 Cergy-Pontoise, France; E-mail: Jacques.auge@u-cergy.fr

**Supporting information**

|                                                                            | <b>page</b> |
|----------------------------------------------------------------------------|-------------|
| <b>Examples of calculations</b>                                            |             |
| - One step transformation without recycling: preparation of <b>1</b>       | 2           |
| - One step transformation with solvent recycling: preparation of <b>19</b> | 3           |
| - Multi-step transformation: Preparation of <b>15</b>                      | 4           |
| <b>Spectra</b>                                                             |             |
| - Bis propargylated PEG <sub>6000</sub> ( <b>1</b> )                       |             |
| <sup>1</sup> H NMR                                                         | 8           |
| <sup>13</sup> C NMR                                                        | 8           |
| MALDI TOF                                                                  | 9           |
| - Pentaerythritol triallyl ether <b>6</b>                                  |             |
| <sup>1</sup> H NMR                                                         | 9           |
| <sup>13</sup> C NMR                                                        | 10          |
| - Compound <b>9</b>                                                        |             |
| <sup>1</sup> H NMR                                                         | 10          |
| <sup>13</sup> C NMR                                                        | 11          |
| - Compound <b>10</b>                                                       |             |
| <sup>1</sup> H NMR                                                         | 11          |
| <sup>13</sup> C NMR                                                        | 12          |
| - Compound <b>11</b>                                                       |             |
| <sup>1</sup> H NMR                                                         | 12          |
| <sup>13</sup> C NMR                                                        | 13          |
| - Compound <b>12</b>                                                       |             |
| <sup>1</sup> H NMR                                                         | 13          |
| <sup>13</sup> C NMR                                                        | 14          |
| - PEG <sub>6000</sub> with 6 allyl functions ( <b>13</b> )                 |             |
| <sup>1</sup> H NMR                                                         | 14          |
| <sup>13</sup> C NMR                                                        | 15          |
| MALDI TOF                                                                  | 15          |
| - PEG <sub>6000</sub> with 6 alcohol functions ( <b>15</b> )               |             |
| <sup>1</sup> H NMR                                                         | 16          |
| <sup>13</sup> C NMR                                                        | 16          |
| MALDI TOF                                                                  | 17          |
| - Compound <b>17</b>                                                       |             |
| <sup>1</sup> H NMR                                                         | 17          |
| <sup>13</sup> C NMR                                                        | 18          |
| - Compound <b>18</b>                                                       |             |
| <sup>1</sup> H NMR                                                         | 18          |
| <sup>13</sup> C NMR                                                        | 19          |
| - Compound <b>19</b>                                                       |             |
| <sup>1</sup> H NMR                                                         | 19          |
| <sup>13</sup> C NMR                                                        | 20          |
| - Compound <b>20</b>                                                       |             |
| <sup>1</sup> H NMR                                                         | 20          |
| <sup>13</sup> C NMR                                                        | 21          |
| - Compound <b>21</b>                                                       |             |
| <sup>1</sup> H NMR                                                         | 21          |
| <sup>13</sup> C NMR                                                        | 22          |
| - PEG <sub>6000</sub> with 18 allyl functions ( <b>22</b> )                |             |
| <sup>1</sup> H NMR                                                         | 22          |
| <sup>13</sup> C NMR                                                        | 23          |
| MALDI TOF                                                                  | 23          |
| - PEG <sub>6000</sub> with 18 alcohol functions ( <b>23</b> )              |             |
| <sup>1</sup> H NMR                                                         | 24          |
| <sup>13</sup> C NMR                                                        | 24          |
| MALDI TOF                                                                  | 25          |

## Examples of calculations

The determination of the green metrics can be done in a very easy way considering the mass of all the reagents and auxiliaries used in the reaction. Alternatively, we also show here how they can be calculated using the general formalism we developed.<sup>1</sup>

The results are presented here in tables, we generally used a spreadsheet application (Excel) to perform the calculations.

### - One step transformation without recycling: Preparation of 1

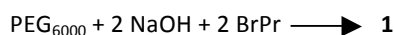

$$\text{AE} = M_1/[M_{\text{PEG}} + 2M_{\text{NaOH}} + 2M_{\text{BrPr}}] = \mathbf{0.962798251}$$

#### -Reaction

| compound             | M      | volume mL | density | mass g | mol         |
|----------------------|--------|-----------|---------|--------|-------------|
| PEG <sub>6000</sub>  | 6185   |           |         | 40     | 0.006467259 |
| THF                  |        | 30        | 0.8892  | 26.676 |             |
| NaOH                 | 40     |           |         | 5.34   | 0.1335      |
| H <sub>2</sub> O     |        | 11        |         | 11     |             |
| BrPr 80%w in toluene | 118.96 | 4.3       | 1.335   | 4.5924 | 0.038604573 |

|                                                                                                       |                                                                                                   |             |
|-------------------------------------------------------------------------------------------------------|---------------------------------------------------------------------------------------------------|-------------|
| stoichiometric ratio between NaOH and PEG                                                             | $\varphi_1 = \text{mol}_{\text{NaOH}}/2/\text{mol}_{\text{PEG}}$                                  | 10.32121875 |
| ratio between the mass of the excess of NaOH and the mass of the reactants in a stoichiometric amount | $b_1 = (\varphi_1 - 1) * 2M_{\text{NaOH}}/[M_{\text{PEG}} + 2M_{\text{NaOH}} + 2M_{\text{BrPr}}]$ | 0.114671178 |
| stoichiometric ratio between BrPr and PEG                                                             | $\varphi_2 = \text{mol}_{\text{BrPr}}/2/\text{mol}_{\text{PEG}}$                                  | 2.984616047 |
| ratio between the mass of the excess of BrPr and the mass of the reactants in a stoichiometric amount | $b_2 = (\varphi_2 - 1) * 2M_{\text{BrPr}}/[M_{\text{PEG}} + 2M_{\text{NaOH}} + 2M_{\text{BrPr}}]$ | 0.072610435 |

#### - Workup

by extraction/precipitation

|                                                                  | M           | volume mL | density | mass g    | Yield             |
|------------------------------------------------------------------|-------------|-----------|---------|-----------|-------------------|
| CH <sub>2</sub> Cl <sub>2</sub>                                  |             | 200       | 1,3     | 260       |                   |
| aq. KH <sub>2</sub> PO <sub>4</sub>                              |             | 80        | 1.1527  | 92.216    |                   |
| H <sub>2</sub> O                                                 |             | 40        | 1       | 40        |                   |
| Na <sub>2</sub> SO <sub>4</sub>                                  |             |           |         | 10        |                   |
| Et <sub>2</sub> O (precipitation)                                |             | 450       | 0.7134  | 321.03    |                   |
| Et <sub>2</sub> O (washing)                                      |             | 200       | 0.7134  | 142.68    |                   |
| <b>product 1 (C<sub>286</sub>H<sub>566</sub>O<sub>141</sub>)</b> | <b>6261</b> |           |         | <b>39</b> | <b>0.96316483</b> |

|                     |                                                                                                                                                                                                                                                                                  |         |
|---------------------|----------------------------------------------------------------------------------------------------------------------------------------------------------------------------------------------------------------------------------------------------------------------------------|---------|
| Mass of reactants   | = m <sub>PEG</sub> + m <sub>NaOH</sub> + m <sub>BrPr</sub>                                                                                                                                                                                                                       | 49.9324 |
| Mass of auxiliaries | = m <sub>THF</sub> + m <sub>H<sub>2</sub>O</sub> + m <sub>CH<sub>2</sub>Cl<sub>2</sub></sub> + m <sub>aq. KH<sub>2</sub>PO<sub>4</sub></sub> + m <sub>H<sub>2</sub>O</sub> + m <sub>aq. Na<sub>2</sub>SO<sub>4</sub></sub> + m <sub>Et<sub>2</sub>O</sub> + m <sub>toluene</sub> | 904.750 |

<sup>1</sup> J. Augé, *Green Chem.*, 2008, **10**, 225-231; J. Augé and M.-C. Scherrmann *New J. Chem.*, 2012, **36**, 1091-1098.

|                                 |                                                                                                              |                    |
|---------------------------------|--------------------------------------------------------------------------------------------------------------|--------------------|
| <b>Reaction mass efficiency</b> | $RME = \frac{\text{mass of product}}{\text{mass of reactants}}$ $RME = \frac{\varepsilon AE}{1 + b_1 + b_2}$ | <b>0.781055988</b> |
| <b>Global mass efficiency</b>   | $GME = \frac{\text{mass of product}}{\text{mass of react. + mass of auxiliaries}}$                           | <b>0.040851278</b> |
| <b>E</b>                        | $E = \frac{\text{mass of waste}}{\text{mass of product}}$                                                    | <b>23.47903</b>    |

by ultrafiltration

|                                                                  | <b>M</b>    | <b>volume<br/>mL</b> | <b>density</b> | <b>mass g</b> | <b>Yield</b>       |
|------------------------------------------------------------------|-------------|----------------------|----------------|---------------|--------------------|
| H <sub>2</sub> O Ultrafiltration 1                               |             | 160                  | 1,3            | 160           |                    |
| H <sub>2</sub> O Ultrafiltration 2                               |             | 120                  | 1              | 120           |                    |
| H <sub>2</sub> O Ultrafiltration 3                               |             | 120                  | 1              | 120           |                    |
| <b>product 1 (C<sub>286</sub>H<sub>566</sub>O<sub>141</sub>)</b> | <b>6261</b> |                      |                | <b>38.5</b>   | <b>0.950816563</b> |

|                                                                                |                                                                                                            |          |
|--------------------------------------------------------------------------------|------------------------------------------------------------------------------------------------------------|----------|
| <b>Mass of reactants</b>                                                       | = m <sub>PEG</sub> + m <sub>NaOH</sub> + m <sub>BrPr</sub>                                                 | 49.9324  |
| <b>Mass of auxiliaries</b>                                                     | = m <sub>THF</sub> + m <sub>H<sub>2</sub>O</sub> + m <sub>H<sub>2</sub>O (UF)</sub> + m <sub>toluene</sub> | 438.8241 |
| <b>Mass of auxiliaries<br/>(without H<sub>2</sub>O used in<br/>the workup)</b> | = m <sub>THF</sub> + m <sub>H<sub>2</sub>O</sub> + m <sub>toluene</sub>                                    | 38.8241  |

|                                                           |                                                                                                              |                    |
|-----------------------------------------------------------|--------------------------------------------------------------------------------------------------------------|--------------------|
| <b>Reaction mass efficiency</b>                           | $RME = \frac{\text{mass of product}}{\text{mass of reactants}}$ $RME = \frac{\varepsilon AE}{1 + b_1 + b_2}$ | <b>0.771042449</b> |
| <b>Global mass efficiency</b>                             | $GME = \frac{\text{mass of product}}{\text{mass of react. + mass of auxiliaries}}$                           | <b>0.0787713</b>   |
| <b>E</b>                                                  | $E = \frac{\text{mass of waste}}{\text{mass of product}}$                                                    | <b>11.6949</b>     |
| <b>E* (without H<sub>2</sub>O used in the<br/>workup)</b> | $E^* = \frac{\text{mass of waste (without water)}}{\text{mass of product}}$                                  | <b>1.305363</b>    |

- One step transformation with solvent recycling: Preparation of 19

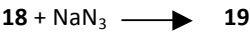

AE = M<sub>19</sub>/[M<sub>18</sub>+M<sub>NaN3</sub>]= **0.931891148**

Reaction

| <b>compound</b>    | <b>M</b> | <b>volume<br/>mL</b> | <b>density</b> | <b>mass g</b> | <b>mol</b>  |
|--------------------|----------|----------------------|----------------|---------------|-------------|
| <b>18</b>          | 1445.66  |                      |                | 20            | 0.013834512 |
| PEG <sub>400</sub> |          | 16                   | 1.128          | 18.048        |             |
| NaN <sub>3</sub>   | 65.01    |                      |                | 0.99          | 0.015228426 |

|                                                                                                                 |                                                                                   |             |
|-----------------------------------------------------------------------------------------------------------------|-----------------------------------------------------------------------------------|-------------|
| stoichiometric ratio between $\text{NaN}_3$ and <b>18</b>                                                       | $\varphi = \text{mol}_{\text{NaN}_3} / \text{mol}_{18}$                           | 1.100756345 |
| ratio between the mass of the excess of $\text{NaN}_3$ and the mass of the reactants in a stoichiometric amount | $\mathbf{b} = (\varphi - 1) \cdot M_{\text{NaN}_3} / [M_{18} + M_{\text{NaN}_3}]$ | 0.004335937 |

## Workup

|                                                                               | M              | volume<br>mL | density | mass g      | yield              |
|-------------------------------------------------------------------------------|----------------|--------------|---------|-------------|--------------------|
| Et <sub>2</sub> O                                                             |                | 40           | 0.7134  | 28.536      |                    |
| H <sub>2</sub> O                                                              |                | 20           | 1       | 20          |                    |
| Na <sub>2</sub> SO <sub>4</sub>                                               |                |              |         | 5           |                    |
| <b>product 19 (C<sub>72</sub>H<sub>118</sub>N<sub>12</sub>O<sub>16</sub>)</b> | <b>1407.78</b> |              |         | <b>19.1</b> | <b>0.980696771</b> |

|                                          |                                                    |        |
|------------------------------------------|----------------------------------------------------|--------|
| Mass of reactants                        | = $m_{18} + m_{NaN3}$                              | 20.99  |
| Mass of auxiliaries                      | = $m_{PEG400} + m_{Et2O} + m_{H2O} + m_{Na2SO4}$   | 71.584 |
| Mass of auxiliaries (1 recycling of PEG) | = $m_{PEG400}/2 + m_{Et2O} + m_{H2O} + m_{Na2SO4}$ | 62.56  |
| Mass of auxiliaries (2 recycling of PEG) | = $m_{PEG400}/3 + m_{Et2O} + m_{H2O} + m_{Na2SO4}$ | 59.552 |
| Mass of auxiliaries (3 recycling of PEG) | = $m_{PEG400}/4 + m_{Et2O} + m_{H2O} + m_{Na2SO4}$ | 58.048 |

|                                 |                                                                                                    |                                                                                                                                                                                                                          |
|---------------------------------|----------------------------------------------------------------------------------------------------|--------------------------------------------------------------------------------------------------------------------------------------------------------------------------------------------------------------------------|
| <b>Reaction mass efficiency</b> | $RME = \frac{\text{mass of product}}{\text{mass of reactants}}$ $RME = \frac{\varepsilon AE}{1+b}$ | <b>0.909957122</b>                                                                                                                                                                                                       |
| <b>Global mass efficiency</b>   | $GME = \frac{\text{mass of product}}{\text{mass of react. + mass of auxiliaries}}$                 | <b>0.206321429</b> (1st use of PEG <sub>400</sub> )<br><b>0.228605625</b> (2nd use of PEG <sub>400</sub> )<br><b>0.237143354</b> (3rd use of PEG <sub>400</sub> )<br><b>0.241655912</b> (4th use of PEG <sub>400</sub> ) |
| <b>E</b>                        | $E = \frac{\text{mass of waste}}{\text{mass of product}}$                                          | <b>3.846806283</b> (1st use of PEG <sub>400</sub> )<br><b>3.37434555</b> (2nd use of PEG <sub>400</sub> )<br><b>3.216858639</b> (3rd use of PEG <sub>400</sub> )<br><b>3.138115183</b> (4th use of PEG <sub>400</sub> )  |

**- Multi-step transformation: Preparation of 15**

For a linear multi-step synthesis, the calculation of GME can be easy but for a multi-sequence convergent synthesis, the problem is more difficult and a general formalism allows for the calculation.<sup>1</sup> The calculation of GRME (global reaction mass efficiency) of **15** is detailed below.

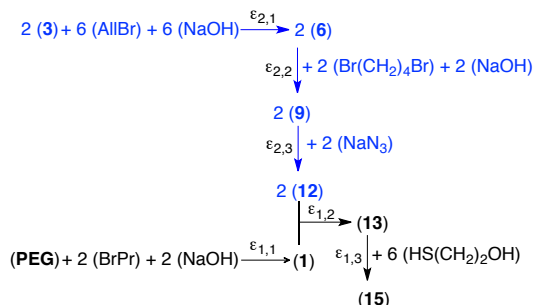

| Compound            | M      | coef. | coef*M  |
|---------------------|--------|-------|---------|
| <b>3</b>            | 136.16 | 2     | 272.32  |
| AllBr               | 120.98 | 6     | 725.88  |
| NaOH                | 40     | 6     | 240     |
| dibromobutane       | 215.91 | 2     | 431.82  |
| NaOH                | 40     | 2     | 80      |
| NaN <sub>3</sub>    | 65.01  | 2     | 130.02  |
| PEG <sub>6000</sub> | 6185   | 1     | 6185    |
| BrPr                | 118.96 | 2     | 237.92  |
| NaOH                | 40     | 2     | 80      |
| mercaptoethanol     | 78.133 | 6     | 468.798 |

The global atom economy is:

$$GAE = \frac{\sum P M_P}{\sum M}$$

where P refers to the product **15** and

$$\sum M = v_{a1} M_{A1} + v_{a2} M_{A2} + \sum_{i=1}^z v_{b1,i} M_{B1,i} + \sum_{j=1}^m v_{b2,j} M_{B2,j}$$

$$\Sigma M = M_{\text{PEG}} + 2 M_3 + 2 M_{\text{BrPr}} + 2 M_{\text{NaOH}} + 6 M_{\text{SH(CH}_2)_2\text{OH}} + 6 M_{\text{AlIBr}} + 6 M_{\text{NaOH}} + 2 M_{\text{Br(CH}_2)_4\text{Br}} + 2 M_{\text{NaOH}} + 2 M_{\text{NaN}_3}$$

$$GAE = M_{15} / \Sigma M = 7437/8851.758 = 0.840172088$$

There are 2 branches in the synthesis of **15**, and therefore two possibilities to carry out the calculation: Either considering the main branch starting from PEG (black branch) or by considering that the reference compound is pentaerythritol **3** (blue branch). As we have demonstrated,<sup>1</sup> the final result is exactly the same. We chose here to consider that the black branch is the main branch.

Total yield from PEG (black branch):  $\Pi \epsilon_{(\text{PEG})} = \epsilon_{1,1} \epsilon_{1,2} \epsilon_{1,3} = 0.845246869$

Total yield from pentaerythritol **3** (blue branch):

For this calculation, we have to considerate the stoichiometric ratio between **12** and **1**:

$$\varphi_{1,2} = \text{mol}_{12} / \text{mol}_1 / 2 = 1.139607295$$

$$\Pi \epsilon_{(3)} = \epsilon_{2,1} \epsilon_{2,2} \epsilon_{2,3} (\epsilon_{1,2} / \varphi) \epsilon_{1,3} = 0.418203894$$

|                                                                                                                                                    |                                                                            |             |
|----------------------------------------------------------------------------------------------------------------------------------------------------|----------------------------------------------------------------------------|-------------|
| number of moles of the reference molecule = mol of PEG                                                                                             | $x_1 =$                                                                    | 0.006467259 |
| number of moles of <b>3</b> necessary to give <b>15</b> from $x_1$ mol of PEG                                                                      | $x_2 = 2x_1 \Pi \epsilon_{(\text{PEG})} / \Pi \epsilon_{(3)}$              | 0.02614242  |
| <b>3</b> /PEG (scale ratio)                                                                                                                        | $\sigma_2 = x_2 / 2x_1 = \Pi \epsilon_{(\text{PEG})} / \Pi \epsilon_{(3)}$ | 2.021135818 |
| ratio between the mass of the excess of <b>3</b> and the mass of all the reactants in the ideal case*, for the total synthesis with respect to PEG | $a_2 = (\sigma_2 - 1) 2M_3 / \Sigma M$                                     | 0.031414743 |

\* Ideal case: All the yields (not necessary the last one) are 100% and all the reactions are carried out in the stoichiometric amount.

For the main branch (branch 1 in black): there are 3 steps, involving 2 reagents (step 1), no reagents (step 2) and 1 reagent (step 3). Hence, we have to calculate the ratios between the mass of the excess of every reactant and the mass of all the reactants used in the total synthesis, with respect to PEG. These ratios are  $b_{1,1}$  (branch 1, step 1, reactant 1),  $b_{1,1*}$  (branch 1, step 1, reactant 2),  $b_{1,3}$  (branch 1, step 3, reactant 1). They are calculated using the formula given below.<sup>1</sup>

$$b_{1,i} = \left[ \varphi_{1,i} (\epsilon_{1,1} \epsilon_{1,2} \dots \epsilon_{1,i-1}) - 1 \right] \frac{v_{b1,i} M_{B1,i}}{\sum M}$$

$$\varphi_{1,i} = \frac{\text{mol number of } B_{1,i} / v_{1,i}}{\text{mol number of } P_{1,i-1} / v_{p1,i-1}}$$

| Branch 1<br>step 1                                                                                                                        | PEG + 2 NaOH + 2 BrPr → 1                                                 | yield = $\epsilon_{1,1} =$<br>0.950816563<br>(purification by UF) |
|-------------------------------------------------------------------------------------------------------------------------------------------|---------------------------------------------------------------------------|-------------------------------------------------------------------|
| stoichiometric ratio between NaOH and PEG                                                                                                 | $\varphi_{1,1} = \text{mol}_{\text{NaOH}} / 2 / \text{mol}_{\text{PEG}}$  | 10.32121875                                                       |
| ratio between the mass of the excess of NaOH and the mass of the reactants in the ideal case, for the total synthesis with respect to PEG | $b_{11} = (\varphi_{1,1} - 1) 2M_{\text{NaOH}} / \Sigma M$                | 0.08424287                                                        |
| stoichiometric ratio between BrPr and PEG                                                                                                 | $\varphi_{1,1*} = \text{mol}_{\text{BrPr}} / 2 / \text{mol}_{\text{PEG}}$ | 2.984616047                                                       |
| ratio between the mass of the excess of BrPr and the mass of the reactants in the ideal case, for the total synthesis with respect to PEG | $b_{1,1*} = (\varphi_{1,1*} - 1) 2M_{\text{BrPr}} / \Sigma M$             | 0.053343059                                                       |

|                                                                                                                                                                           |                                                                                                                        |                                              |
|---------------------------------------------------------------------------------------------------------------------------------------------------------------------------|------------------------------------------------------------------------------------------------------------------------|----------------------------------------------|
| <b>Branch 1<br/>step 2</b>                                                                                                                                                | <b>2 (12) + (1) → (13)<br/>no reagent is added : <math>b_{1,2} = 0</math></b>                                          | yield = $\varepsilon_{1,2} =$<br>0.948803923 |
| <b>Branch 1<br/>step 3</b>                                                                                                                                                | <b>(13) + 6 (HS(CH<sub>2</sub>)<sub>2</sub>OH) → (15)</b>                                                              | yield = $\varepsilon_{1,3} =$<br>0.936936937 |
| stoichiometric ratio between HS(CH <sub>2</sub> ) <sub>2</sub> OH and 13                                                                                                  | $\varphi_{1,3} = \text{mol}_{\text{HS(CH}_2\text{)}_2\text{OH}} / 6 / \text{mol}_{10}$                                 | 4.6164421                                    |
| ratio between the mass of the excess of HS(CH <sub>2</sub> ) <sub>2</sub> OH and the mass of the reactants in the ideal case, for the total synthesis with respect to PEG | $b_{1,3} = (\varphi_{1,3} \varepsilon_{1,2} \varepsilon_{1,1} - 1) 6 M_{\text{HS(CH}_2\text{)}_2\text{OH}} / \Sigma M$ | 0.167604108                                  |

For the second branch (branch 2 in blue): there are 3 steps, involving 2 reagents (step 1 and step 2) and 1 reagent (step 3). Hence, we have to calculate the ratios between the mass of the excess of every reactant and the mass of all the reactants used in the total synthesis, with respect to PEG, in the ideal case; *ie*, all the yields (not necessary the last one) are 100% and all the reactions are carried out in the stoichiometric amount. These ratios are  $b_{2,1}$  (branch 2, step 1, reactant 1),  $b_{2,1^*}$  (branch 2, step 1, reactant 2),  $b_{2,2}$  (branch 2, step 2, reactant 1),  $b_{2,2^*}$  (branch 2, step 2, reactant 2) and  $b_{2,3}$  (branch 2, step 3, reactant 1). They are calculated using the formula given below.

$$b_{2,j} = \left[ \sigma_2 \varphi_{2,j} \left( \varepsilon_{2,1} \dots \varepsilon_{2,j-1} \right) - 1 \right] \frac{\nu_{b_{2,j}} M_{B_{2,j}}}{\Sigma M} \quad \varphi_{2,j} = \frac{\text{mol number of } B_{2,j} / \nu_{b_{2,j}}}{\text{mol number of } P_{2,j-1} / \nu_{P_{2,j-1}}}$$

|                                                                                                                                                                           |                                                                                                                   |                                                                                                  |
|---------------------------------------------------------------------------------------------------------------------------------------------------------------------------|-------------------------------------------------------------------------------------------------------------------|--------------------------------------------------------------------------------------------------|
| <b>Branch 2<br/>step 1</b>                                                                                                                                                | <b>3 + 3 NaOH + 3 AlIBr → 6 + 7<br/>7 + NaOH + AlIBr → 6</b>                                                      | yield = $\varepsilon_{2,1} =$<br>0.747438763<br>(2 steps)                                        |
| stoichiometric ratio between NaOH and 3                                                                                                                                   | $\varphi_{2,1} = \text{mol}_{\text{NaOH}} / 3 / \text{mol}_3$                                                     | 1.505573179                                                                                      |
| ratio between the mass of the excess of NaOH and the mass of the reactants, and the mass of the reactants in the ideal case, for the total synthesis with respect to PEG  | $b_{2,1} = (\sigma_2 \varphi_{2,1} - 1) 6 M_{\text{NaOH}} / \Sigma M$                                             | 0.055391516                                                                                      |
| stoichiometric ratio between AlIBr and 3                                                                                                                                  | $\varphi_{2,1^*} = \text{mol}_{\text{AlIBr}} / 3 / \text{mol}_3$                                                  | 1.503536293                                                                                      |
| ratio between the mass of the excess of AlIBr and the mass of the reactants, and the mass of the reactants in the ideal case, for the total synthesis with respect to PEG | $b_{2,1^*} = (\sigma_2 \varphi_{2,1^*} - 1) 6 M_{\text{AlIBr}} / \Sigma M$                                        | 0.167194043                                                                                      |
| <b>Branch 2<br/>step 2</b>                                                                                                                                                | <b>6 + Br(CH<sub>2</sub>)<sub>4</sub>Br + NaOH → 7</b>                                                            | yield = $\varepsilon_{2,2} =$<br>0.728932412<br>(method in water with recovery of dibromobutane) |
| stoichiometric ratio between NaOH and 6                                                                                                                                   | $\varphi_{2,2} = \text{mol}_{\text{NaOH}} / \text{mol}_4$                                                         | 9.859230769                                                                                      |
| ratio between the mass of the excess of NaOH and the mass of the reactants, and the mass of the reactants in the ideal case, for the total synthesis with respect to PEG  | $b_{2,2} = (\sigma_2 \varphi_{2,2} \varepsilon_{2,1} - 1) 2 M_{\text{NaOH}} / \Sigma M$                           | 0.125571404                                                                                      |
| stoichiometric ratio between Br(CH <sub>2</sub> ) <sub>4</sub> Br and 4                                                                                                   | $\varphi_{2,2^*} = \text{mol}_{\text{Br(CH}_2\text{)}_4\text{Br}} / \text{mol}_6$                                 | 1.250574159                                                                                      |
| ratio between the mass of the excess of Br(CH <sub>2</sub> ) <sub>4</sub> Br and the mass of the reactants in the ideal case, for the total synthesis with respect to PEG | $b_{2,2^*} = (\sigma_2 \varphi_{2,2^*} \varepsilon_{2,1} - 1) 2 M_{\text{Br(CH}_2\text{)}_4\text{Br}} / \Sigma M$ | 0.043378873                                                                                      |
| <b>Branch 2<br/>step 3</b>                                                                                                                                                | <b>9 + NaN<sub>3</sub> → 12</b>                                                                                   | yield = $\varepsilon_{2,3} =$<br>0.983996563<br>(method in PEG <sub>400</sub> )                  |
| stoichiometric ratio between NaN <sub>3</sub> and 9                                                                                                                       | $\varphi_{2,3} = \text{mol}_{\text{NaN}_3} / \text{mol}_6$                                                        | 1.098593293                                                                                      |
| ratio between the mass of the excess of NaN <sub>3</sub> and the mass of the reactants in the ideal case, for the total synthesis with respect to PEG                     | $b_{2,3} = (\sigma_2 \varphi_{2,3} \varepsilon_{2,1} \varepsilon_{2,2} - 1) 2 M_{\text{NaN}_3} / \Sigma M$        | 0.003080923                                                                                      |

The general expression of GRME is:

$$GRME = \frac{GAE \prod_{i=1}^z \varepsilon_{1,i}}{1 + a_2 + \sum_{i=1}^z b_{1,i} + \sum_{j=1}^m b_{2,j}}$$

Applied to the synthesis of **15** it becomes:

$$GRME = \frac{GAE \prod_{i=1}^3 \varepsilon_{1,i}}{1 + a_2 + \sum_{i=1}^3 b_{1,i} + \sum_{j=1}^3 b_{2,j}} = \frac{GAE \varepsilon_{1,1} \varepsilon_{1,2} \varepsilon_{1,3}}{1 + a_2 + (b_{1,1} + b_{1,1*} + b_{1,2} + b_{1,3}) + (b_{2,1} + b_{2,1*} + b_{2,2} + b_{2,2*} + b_{2,3})}$$

$$\mathbf{GRME = 0.41020332}$$

## Bis propargylated PEG<sub>6000</sub> (1)

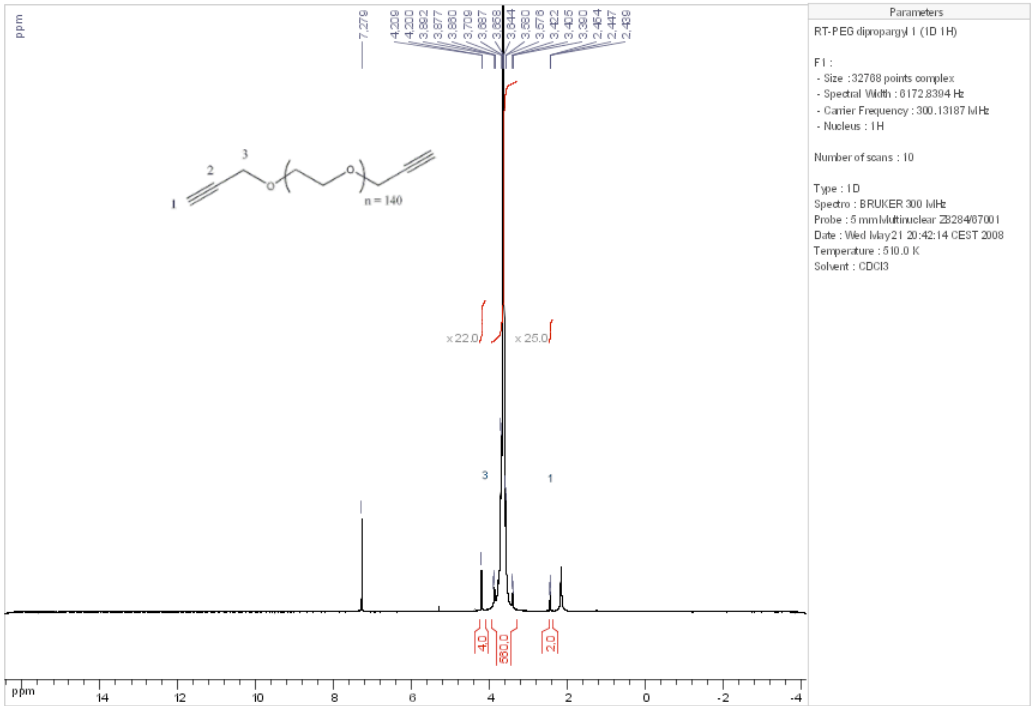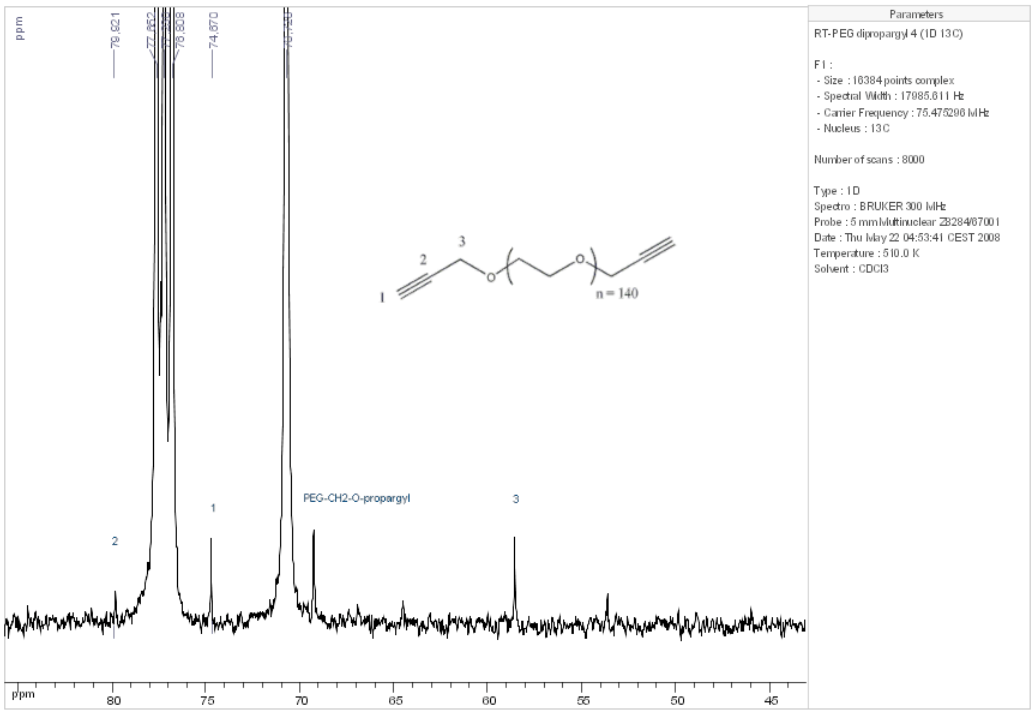



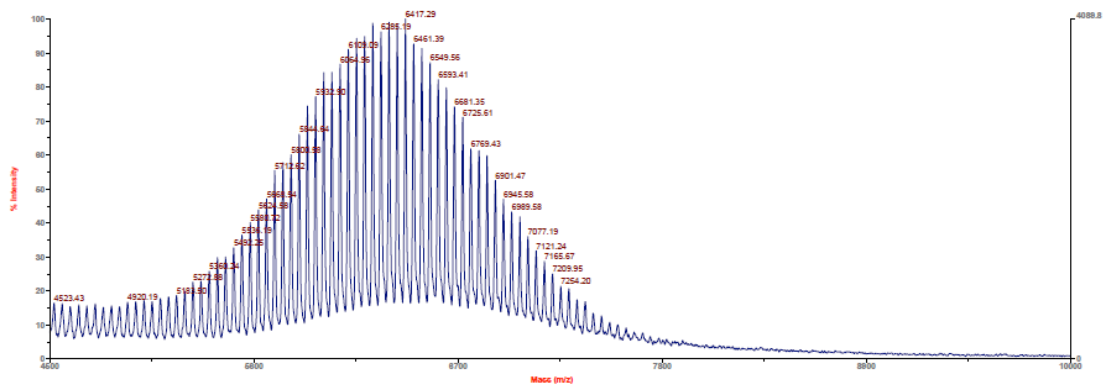

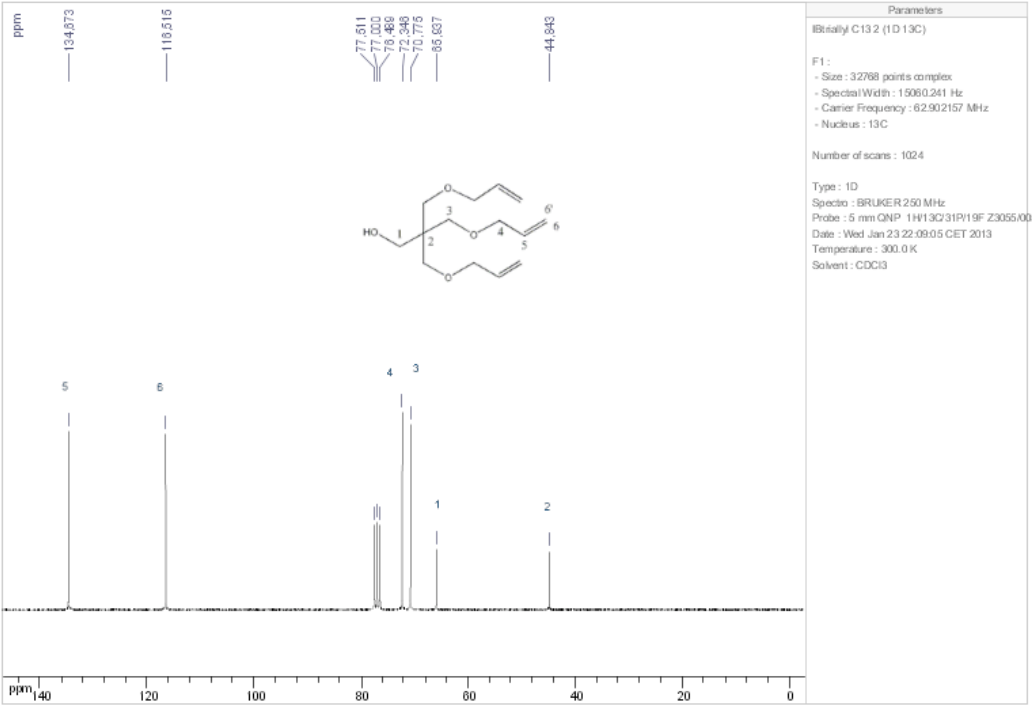

**Compound 9**

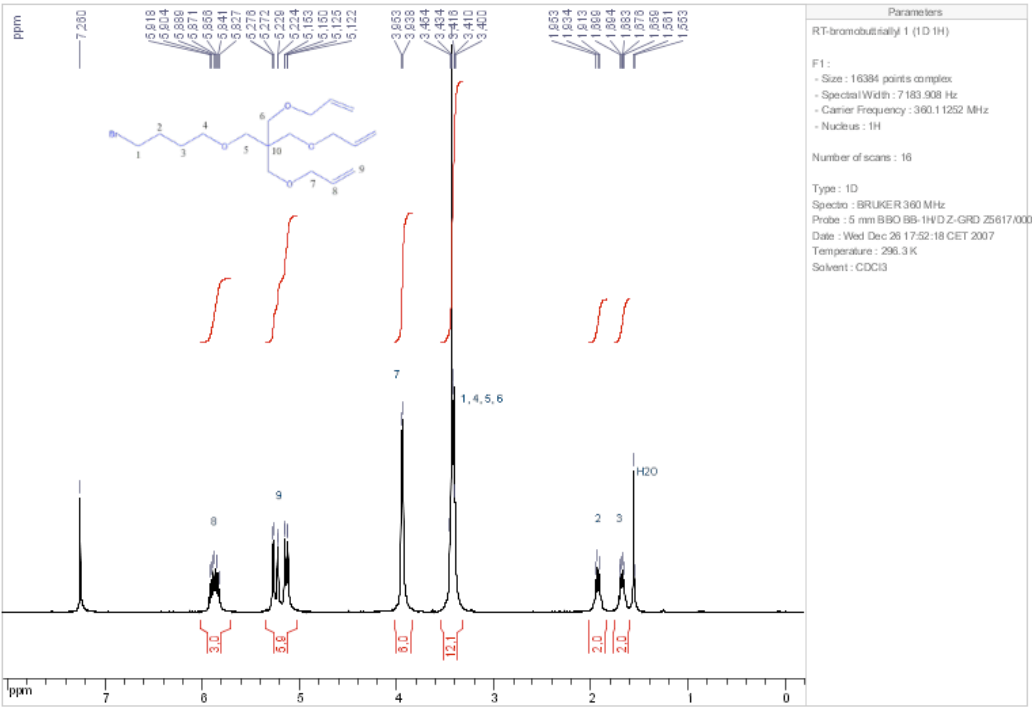

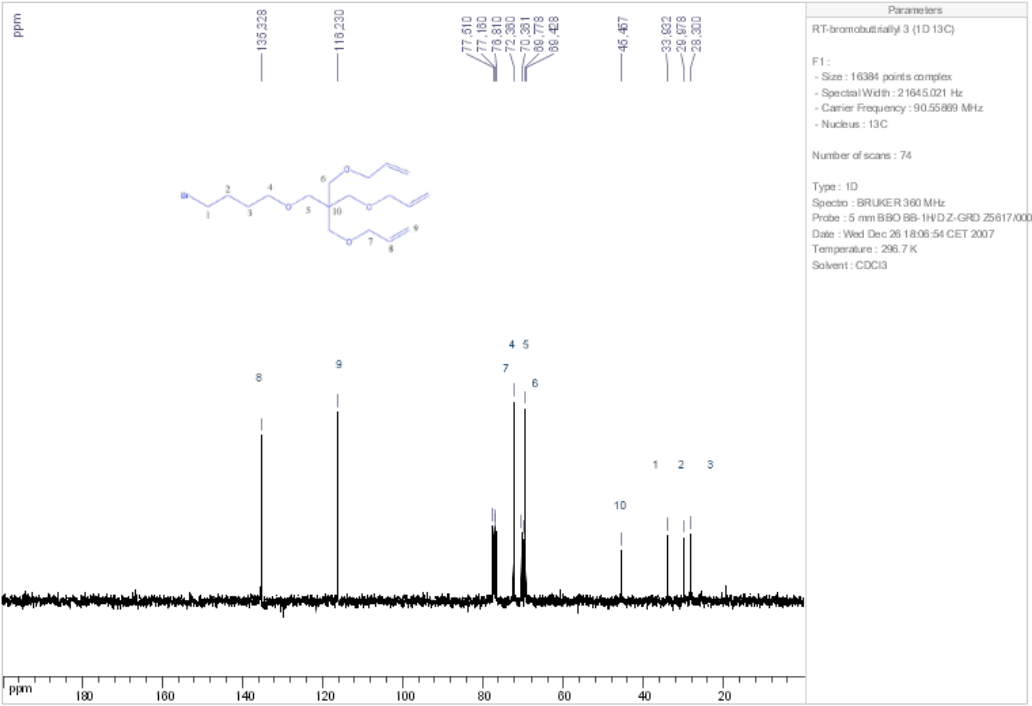

Compound 10

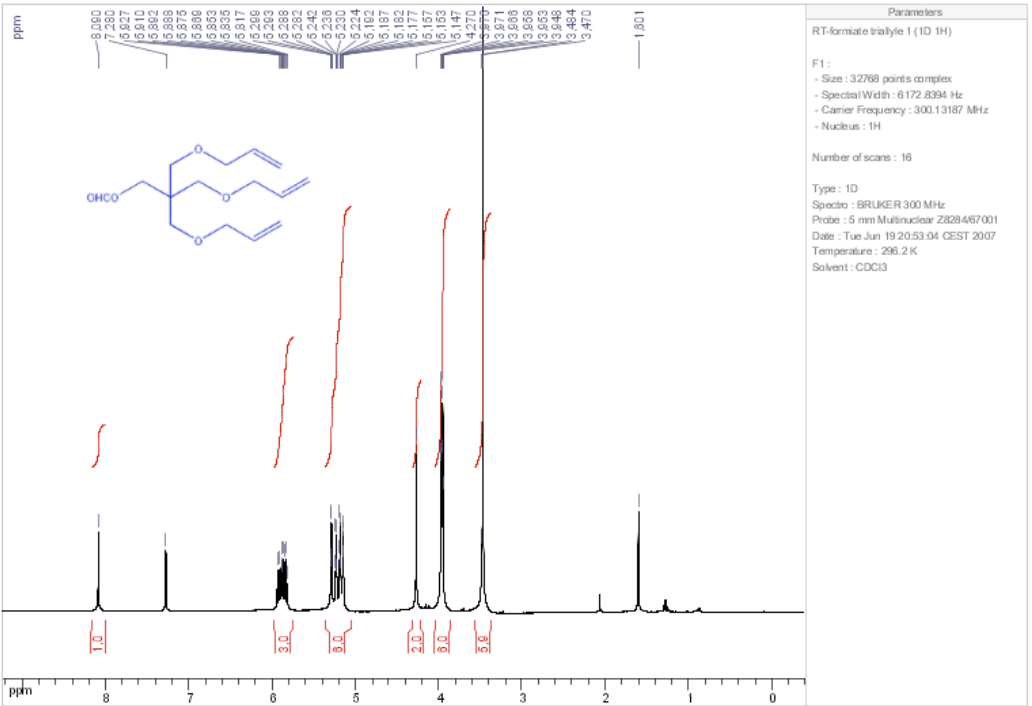

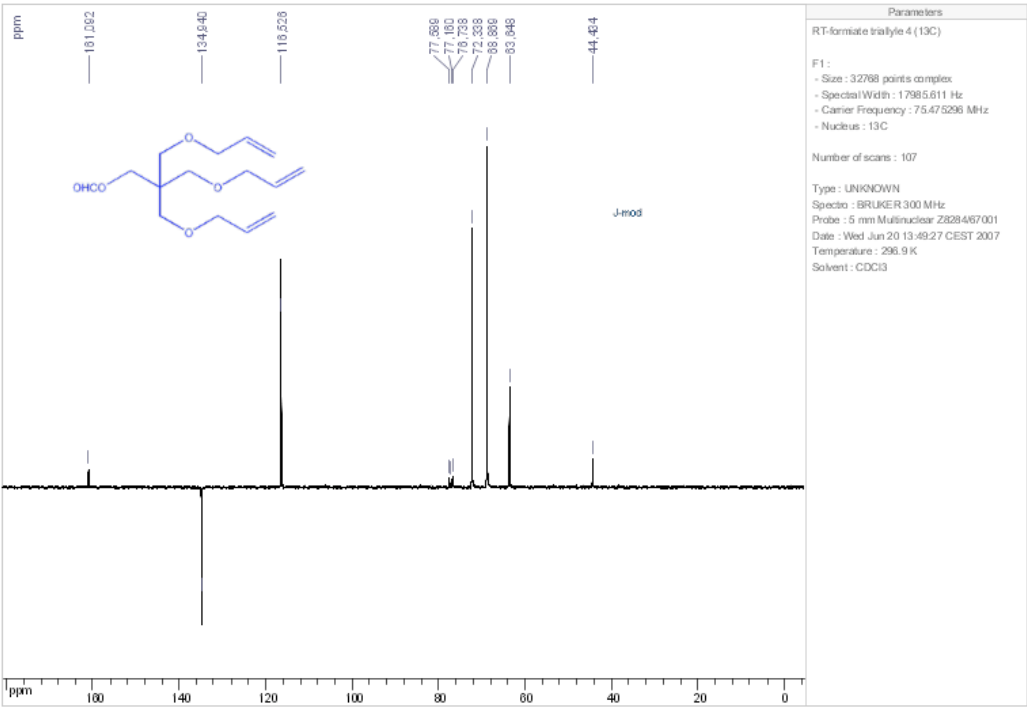

Compound 11

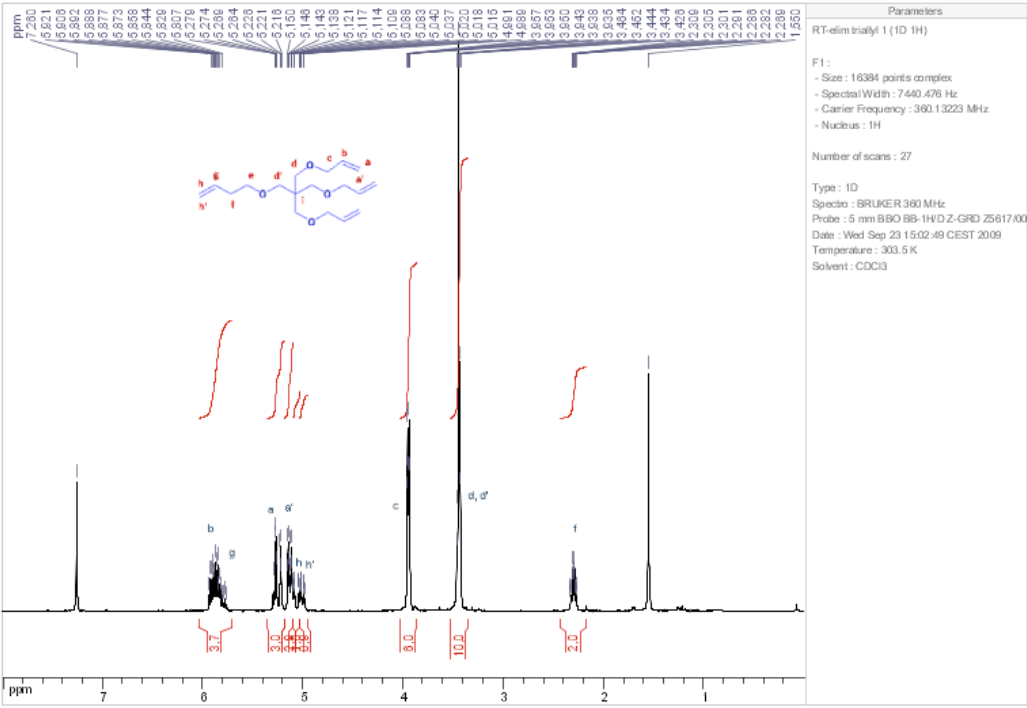

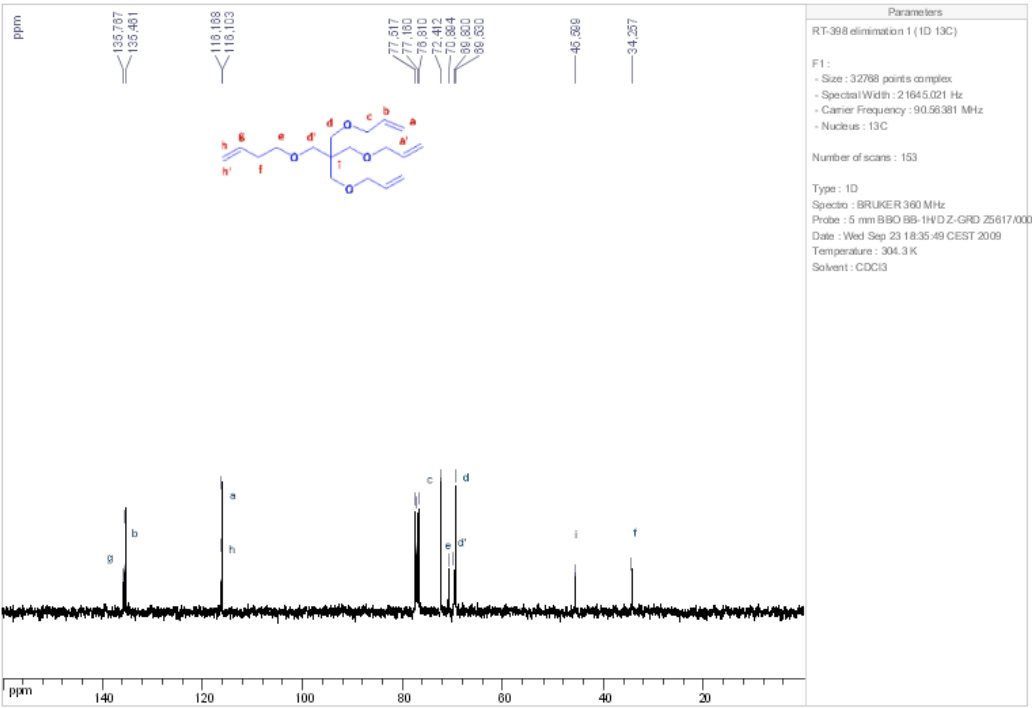

Compound 12

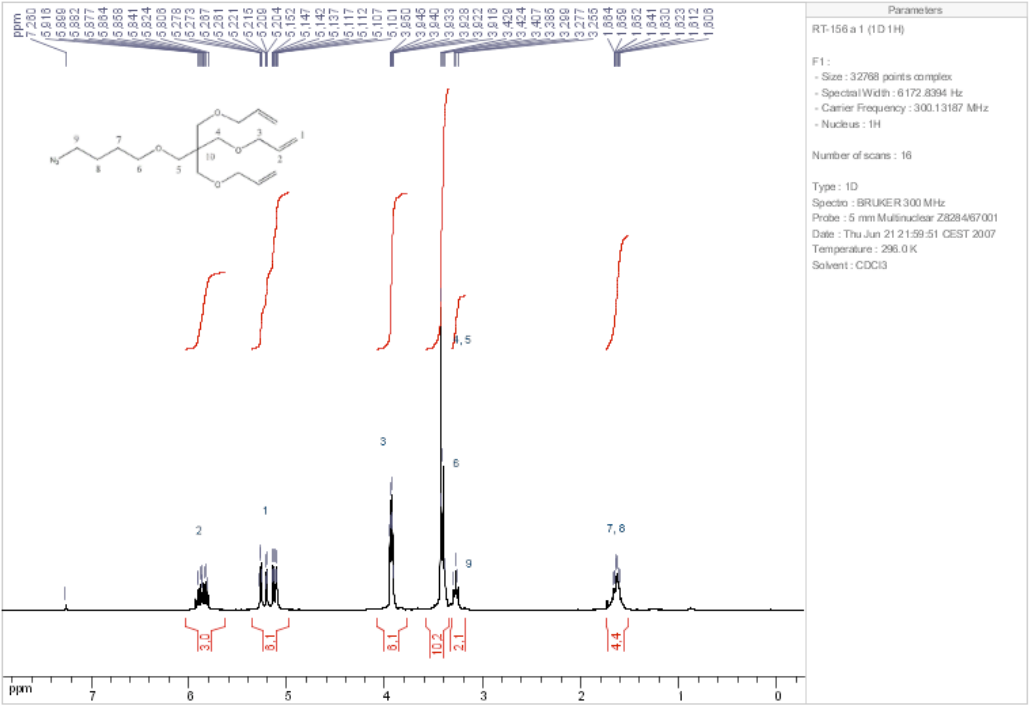

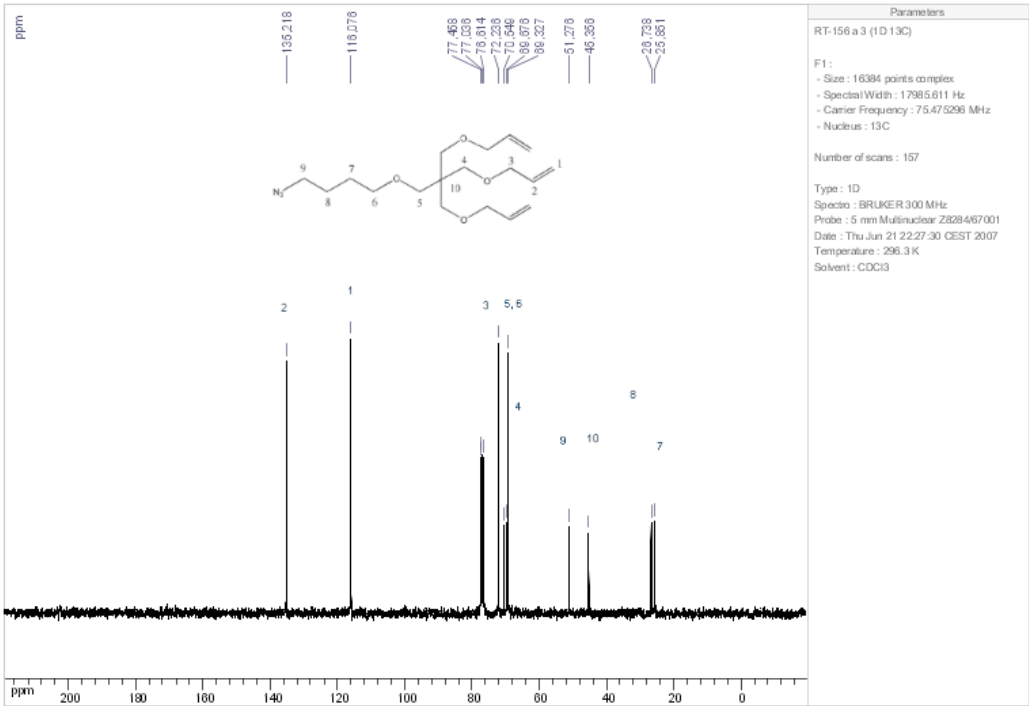

**PEG<sub>6000</sub> with 6 allyl functions (13)**

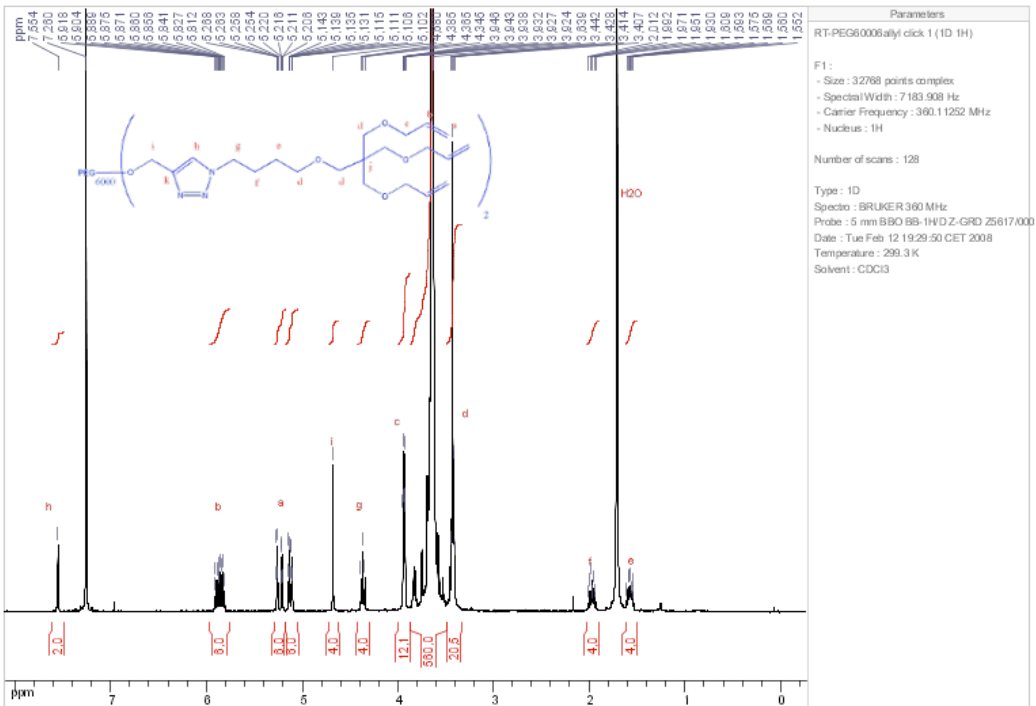

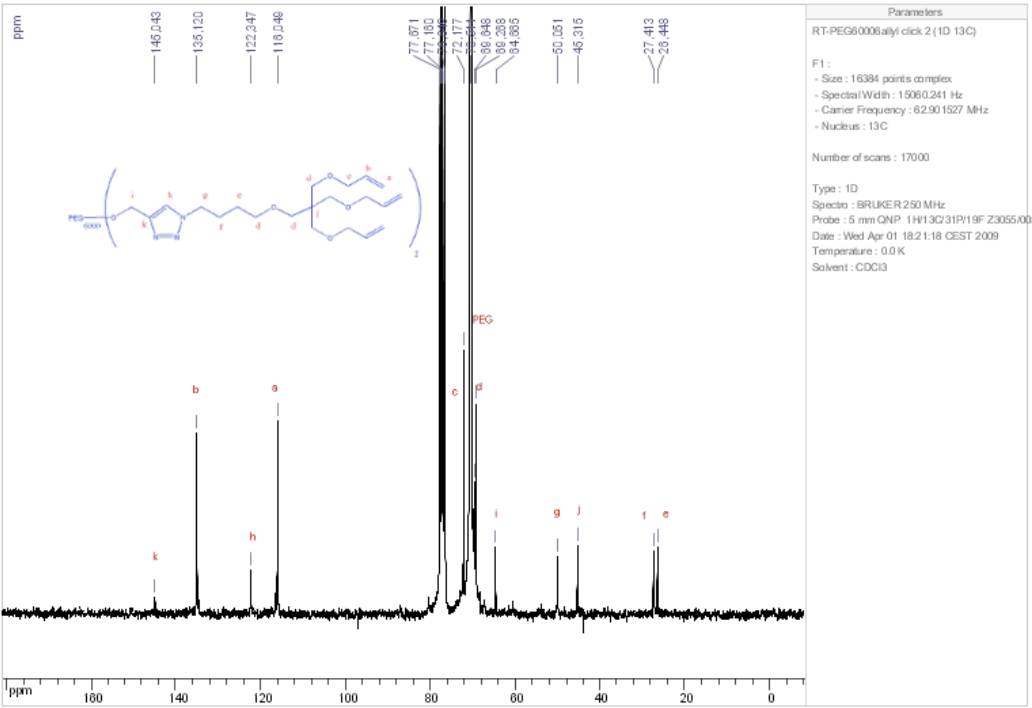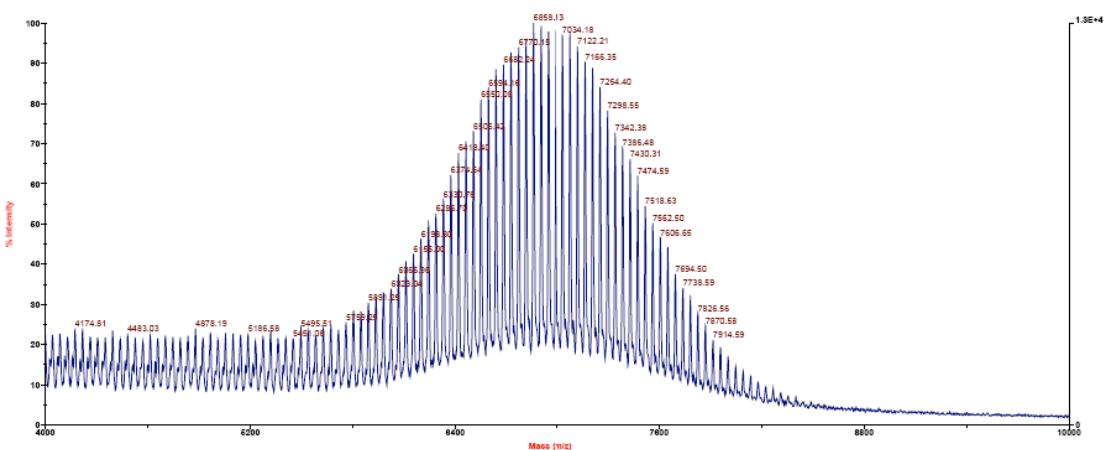





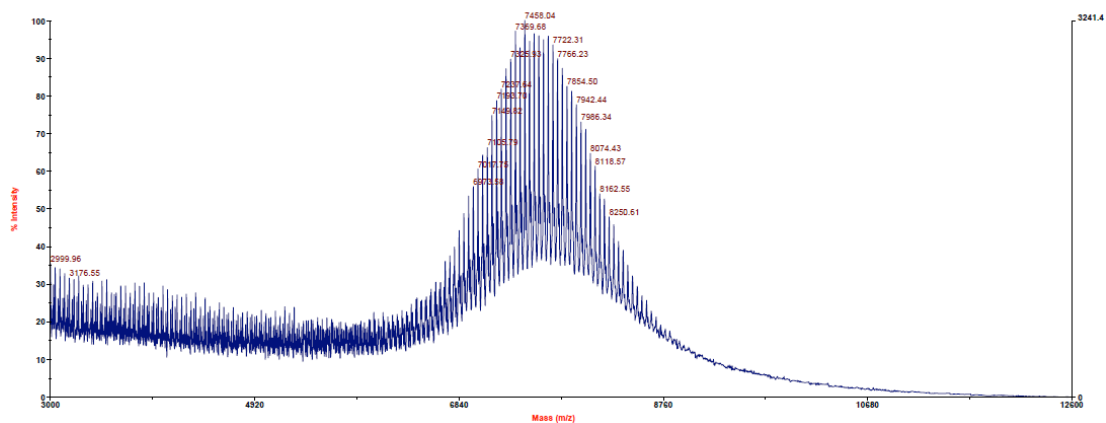

Compound 17

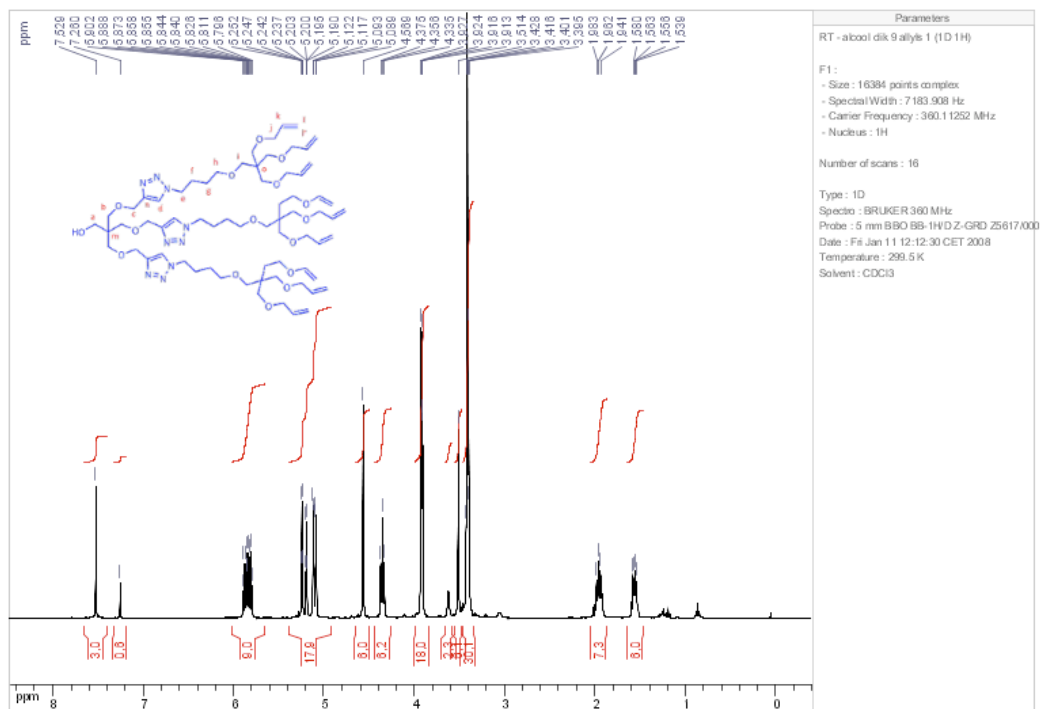

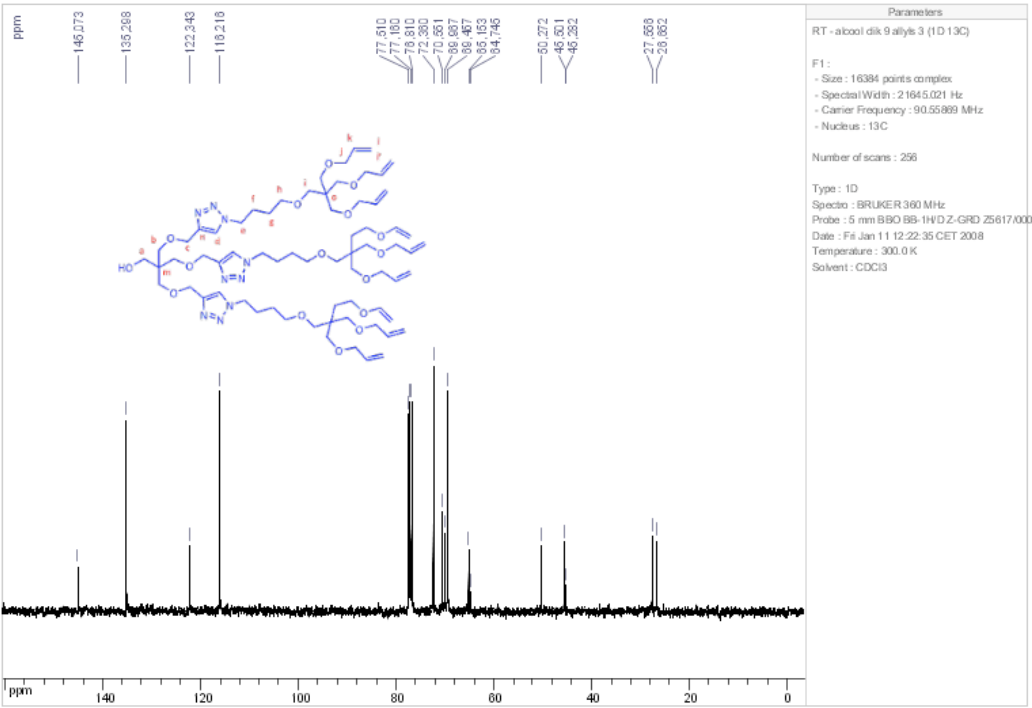

Compound 18

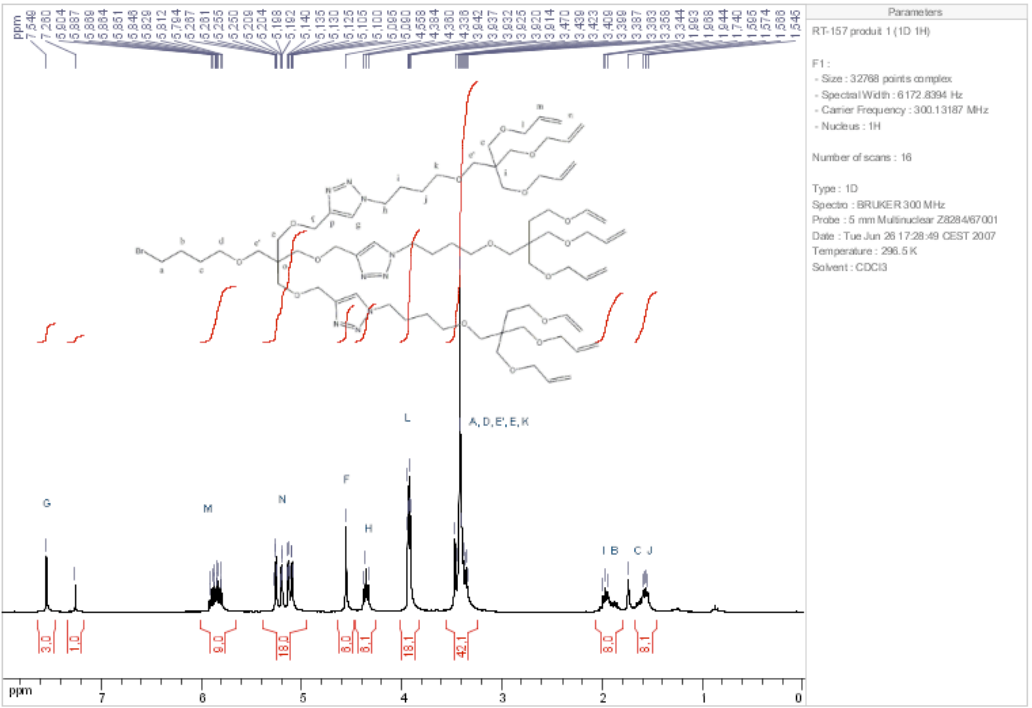

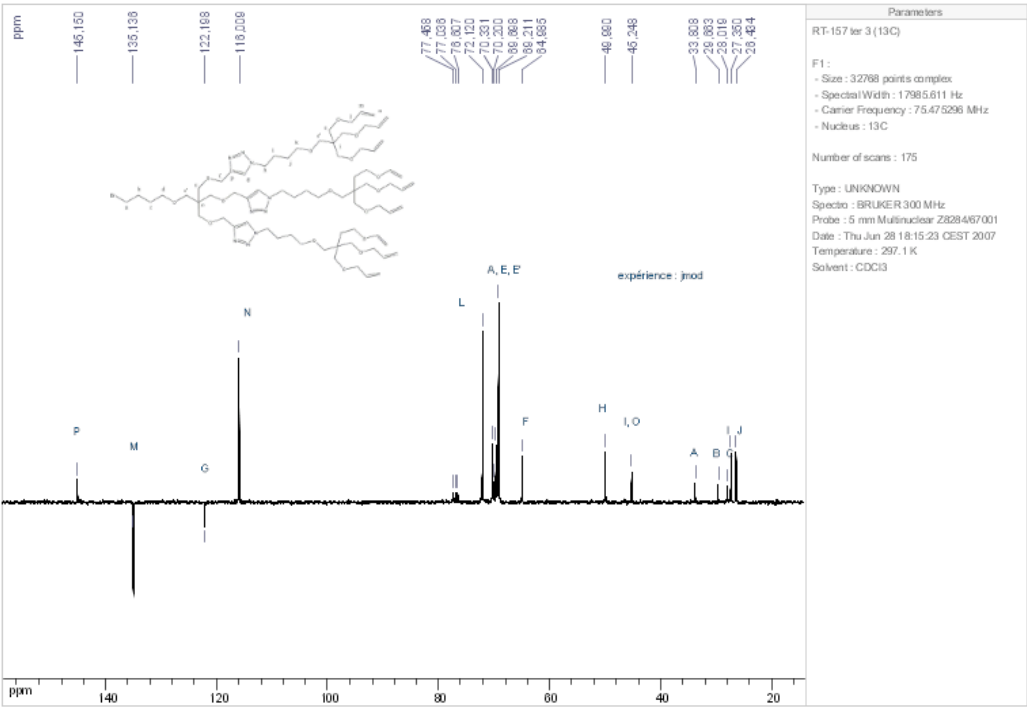

Compound 19

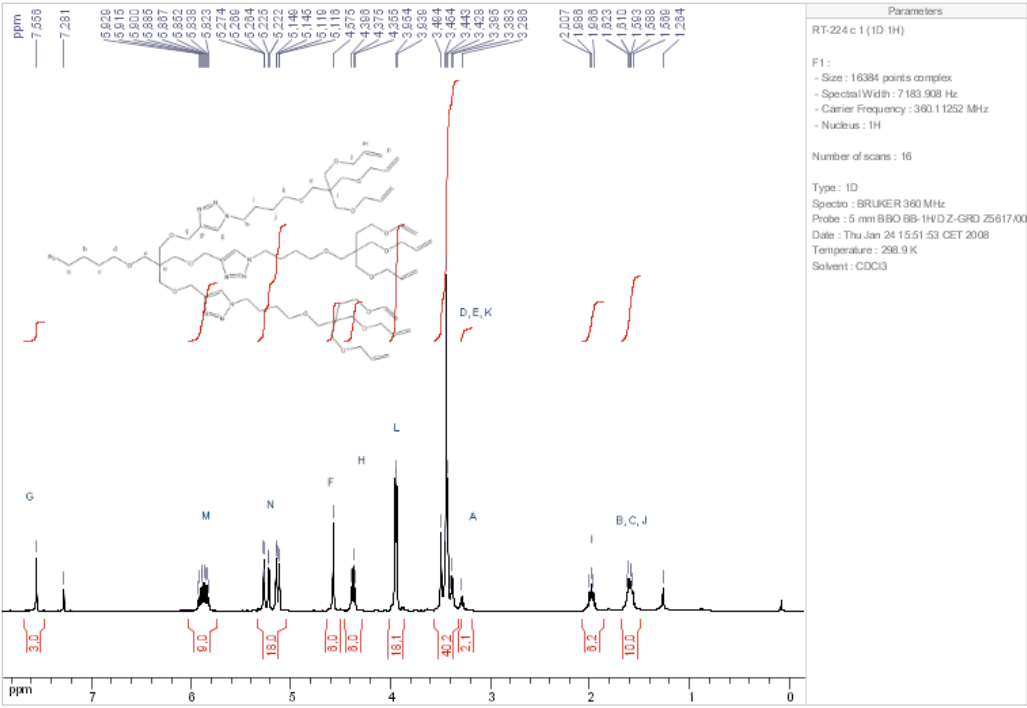

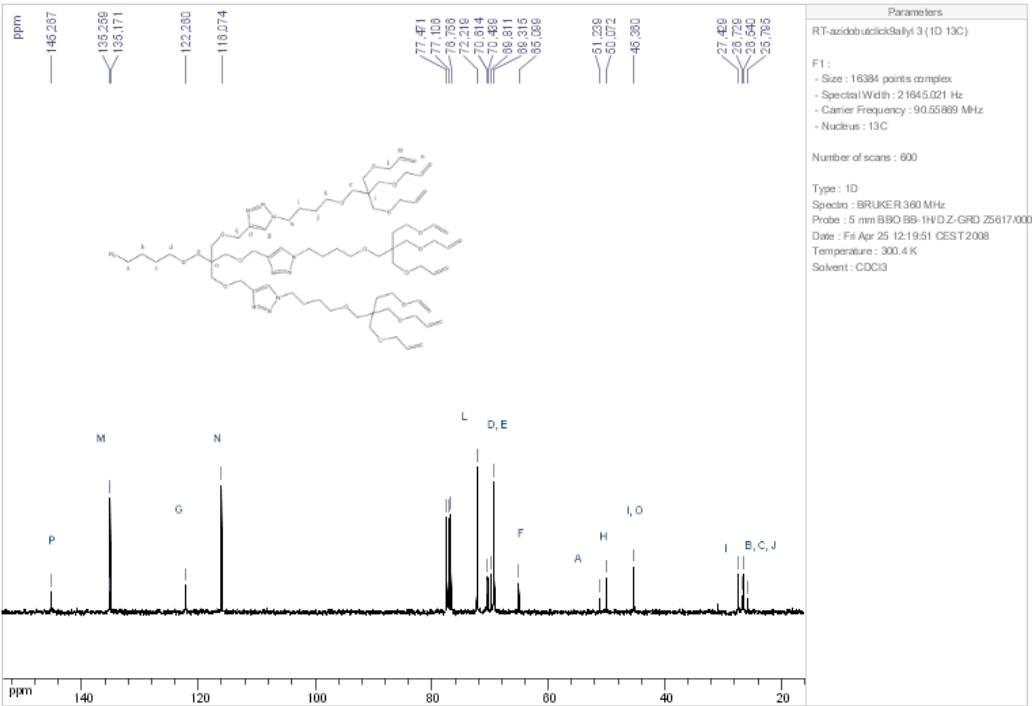

Compound 20

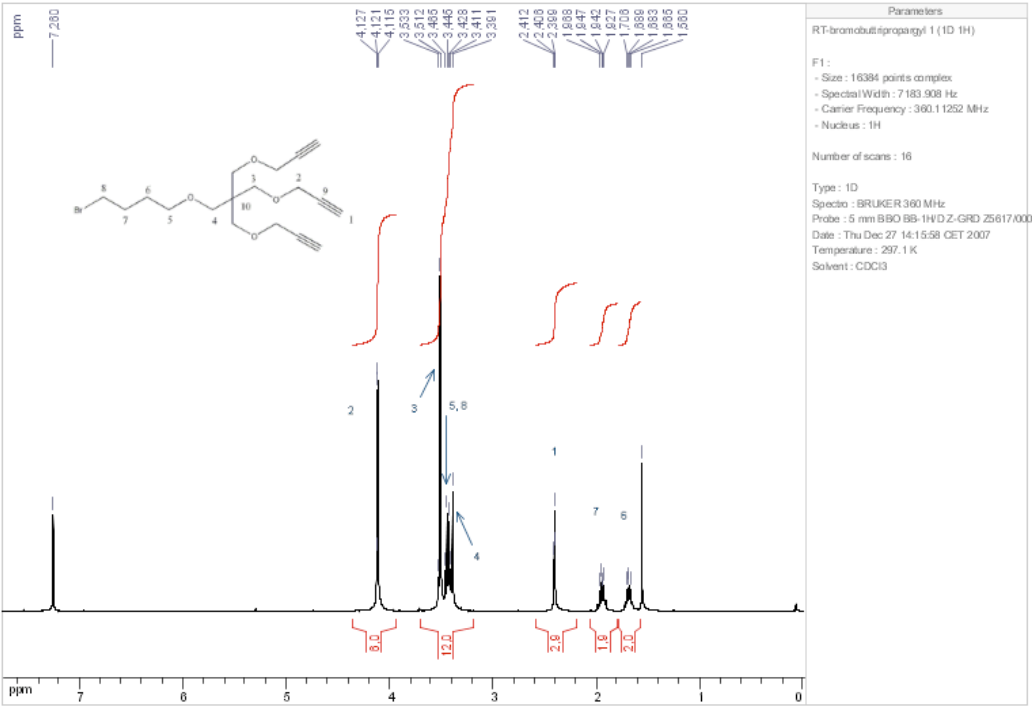

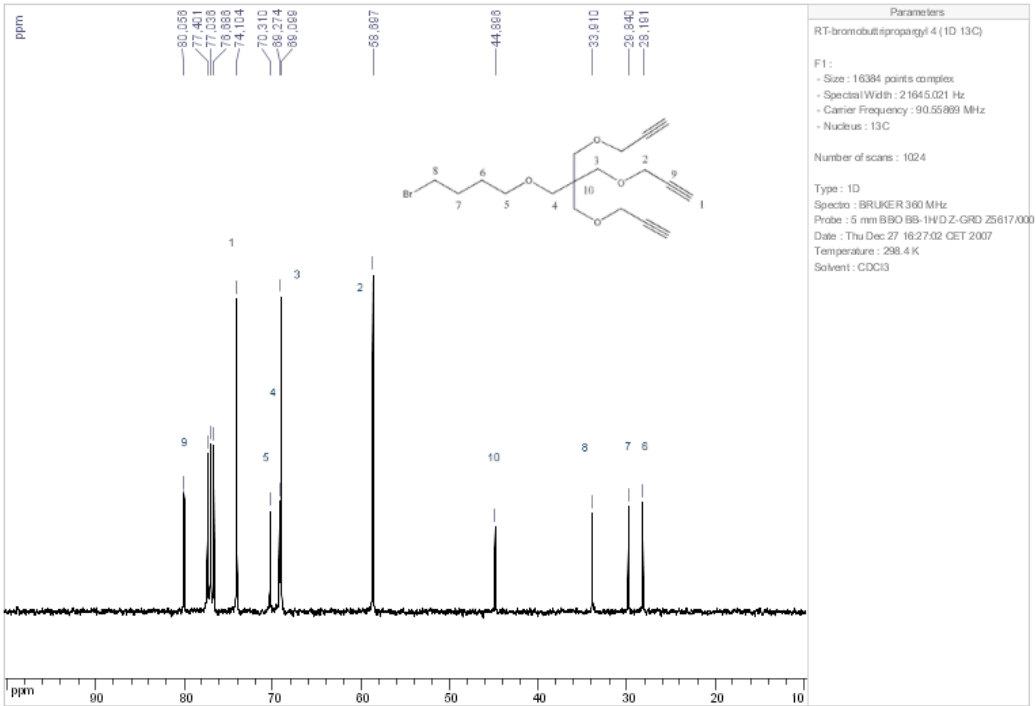

### Compound 21

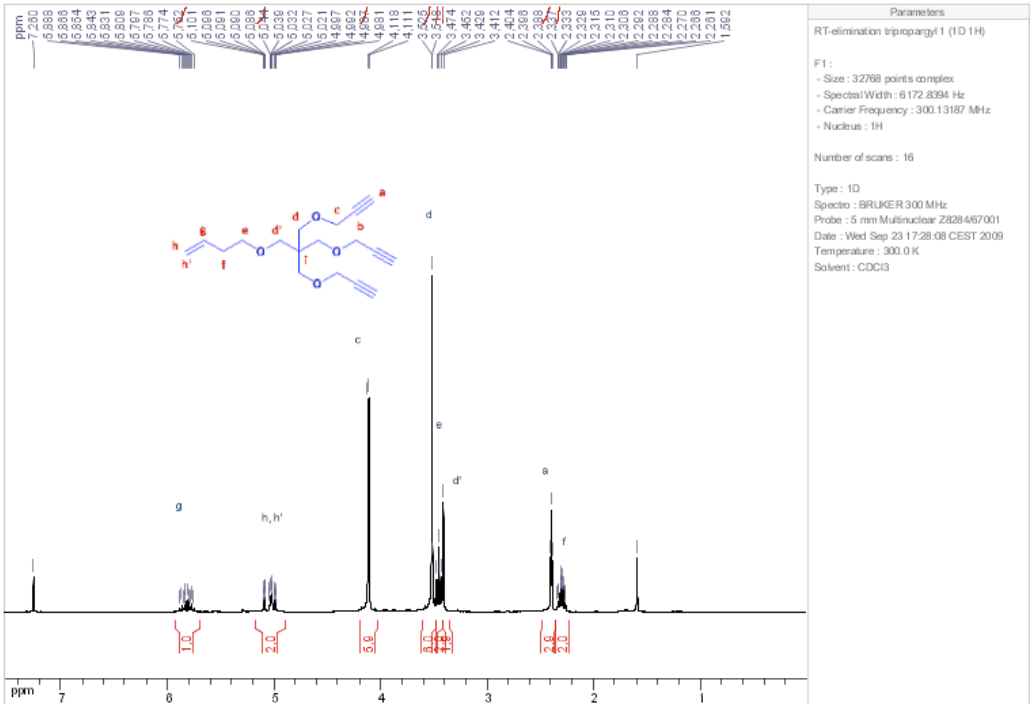

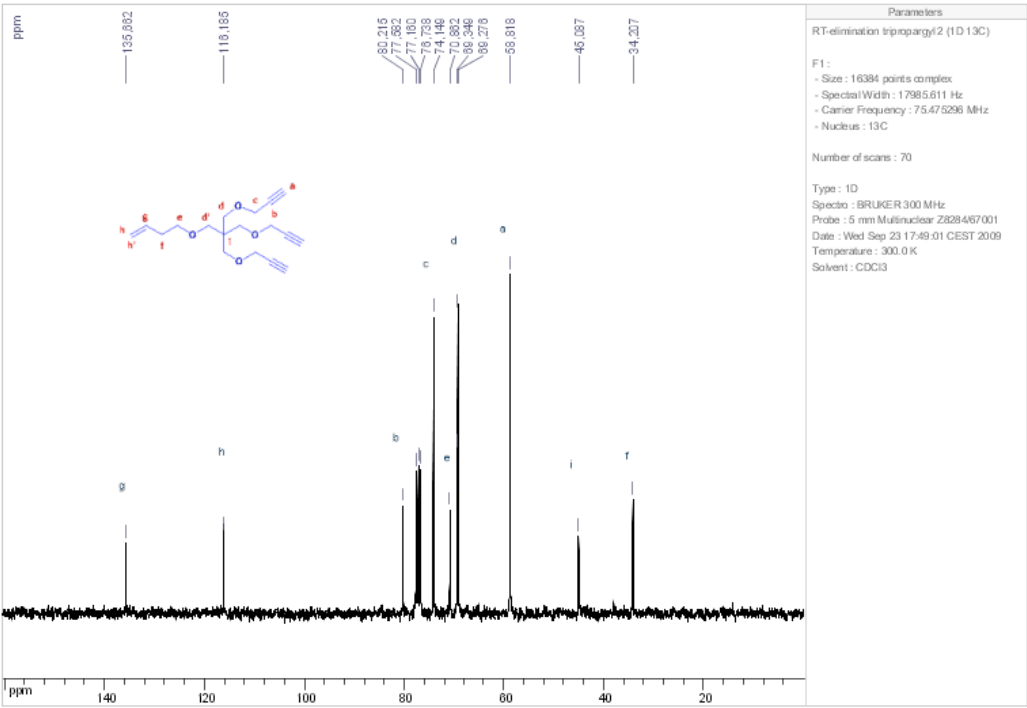

PEG<sub>6000</sub> with 18 allyl functions (22)

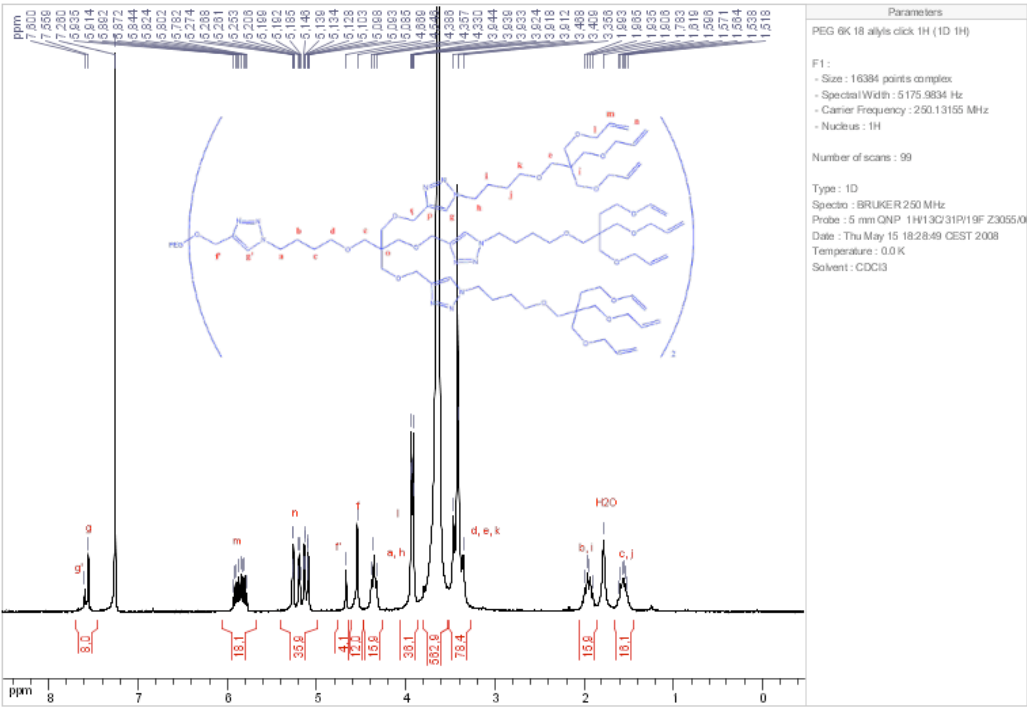

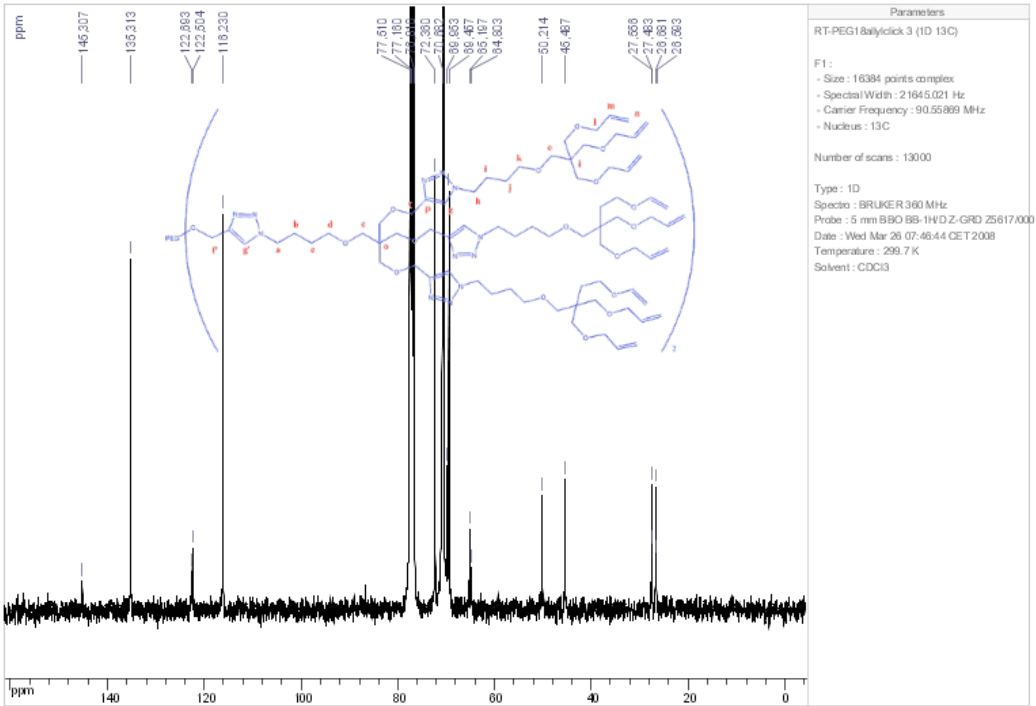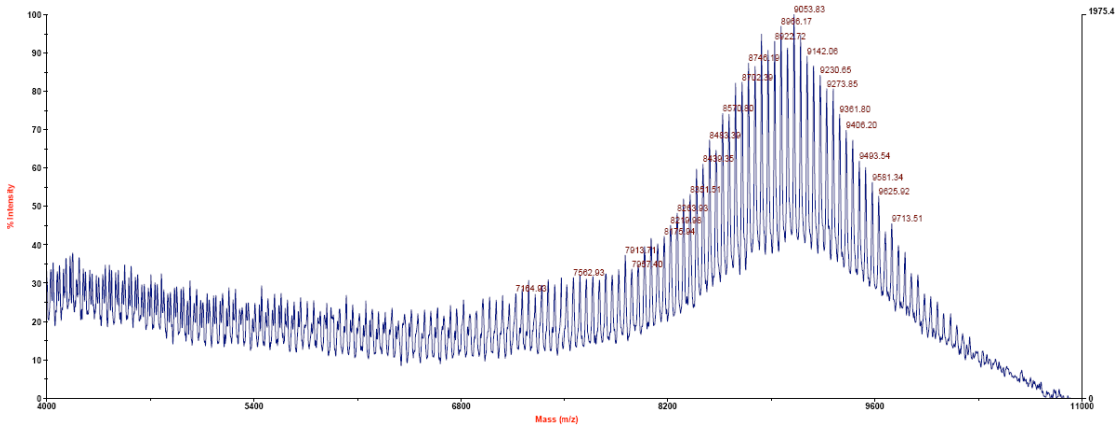

PEG<sub>6000</sub> with 18 alcohol functions (23)

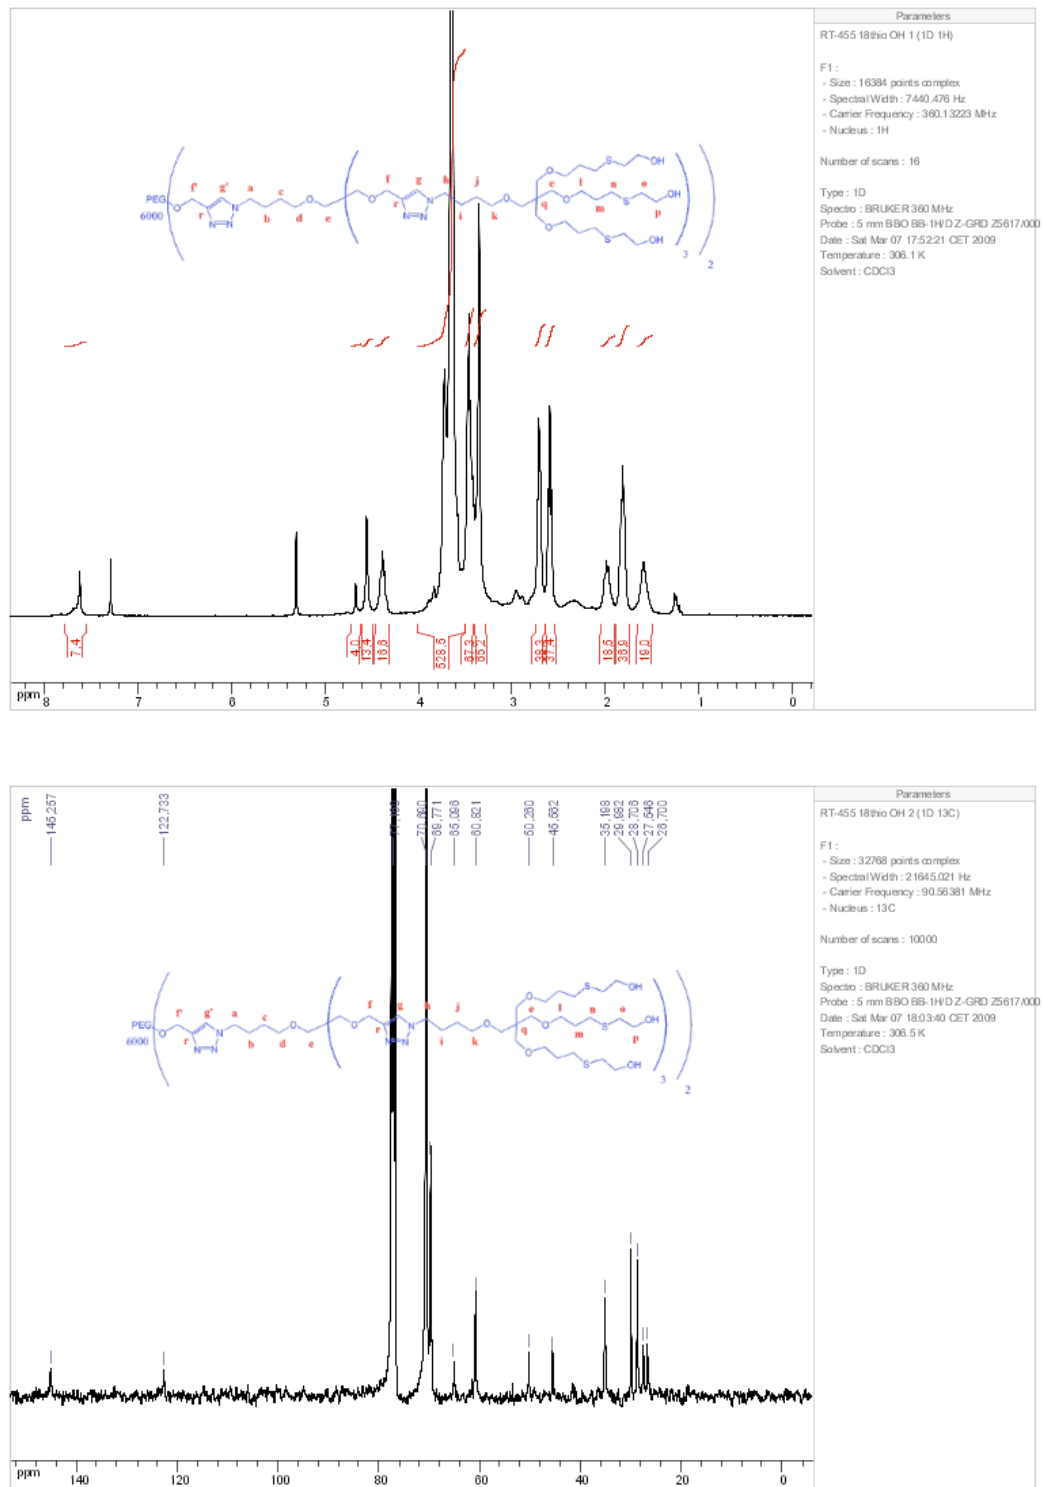



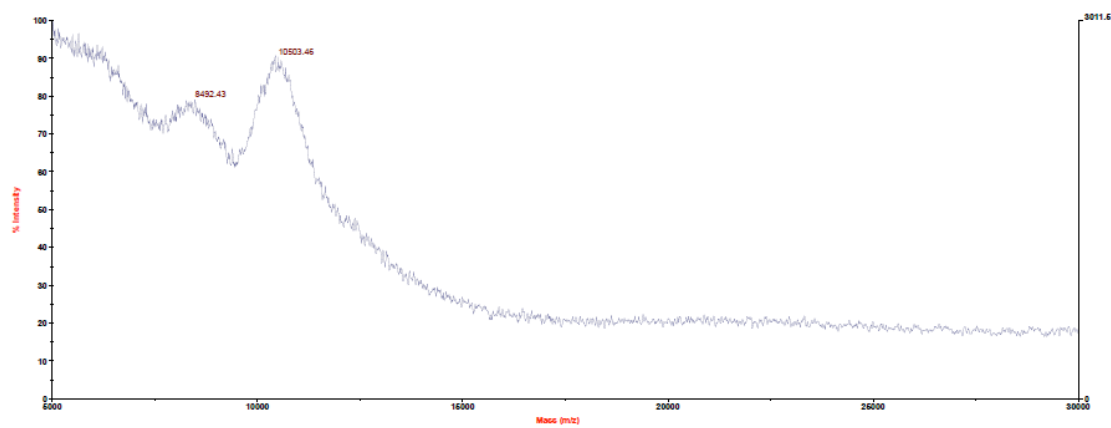

Supplement: c3gc37097f.pdf [file c3gc37097f.pdf]
